# Supplementary material for: Mundhöhlen- und Pharynxkarzinome: Inzidenz, Mortalität und Überleben in Deutschland
Source: Springer Nature journal article supplement (doi:10.1007/s00103-021-03368-z), 2021-07-01

Elektronisches Zusatzmaterial zum Beitrag:

## Mundhöhlen- und Pharynxkarzinome: Inzidenz, Mortalität und Überleben in Deutschland

Lina Jansen<sup>1\*</sup>, Julius Moratin<sup>2\*</sup>, Annika Waldmann<sup>3</sup>, Karim Zaoui<sup>4</sup>, Bernd Holleczek<sup>5</sup>, Alice Nennecke<sup>6</sup>, Ron Pritzkuleit<sup>7</sup>, Peter K. Plinkert<sup>4</sup>, Jürgen Hoffmann<sup>2\*</sup>, Volker Arndt<sup>1,8\*</sup>

\* geteilte Erst-/Letztautorenschaft

<sup>1</sup> Epidemiologisches Krebsregister Baden-Württemberg, Deutsches Krebsforschungszentrum (DKFZ), Heidelberg, Deutschland

<sup>2</sup> Klinik und Poliklinik für Mund-, Kiefer- und Gesichtschirurgie, Universitätsklinikum Heidelberg, Heidelberg, Deutschland

<sup>3</sup> Institut für Sozialmedizin und Epidemiologie, Universität zu Lübeck, Lübeck, Deutschland

<sup>4</sup> Hals-Nasen-Ohrenklinik, Universitätsklinikum Heidelberg, Heidelberg, Deutschland

<sup>5</sup> Krebsregister Saarland, Saarbrücken, Deutschland

<sup>6</sup> Hamburgisches Krebsregister, Hamburg, Deutschland

<sup>7</sup> Institut für Krebs Epidemiologie e.V., Registerstelle des Krebsregisters Schleswig-Holstein, Lübeck, Deutschland

<sup>8</sup> Cancer Survivorship, Abt. klinische Epidemiologie und Altersforschung, Deutsches Krebsforschungszentrum (DKFZ), Heidelberg, Deutschland

### Korrespondenzadresse:

Dr. sc. hum. Lina Jansen  
Epidemiologisches Krebsregister Baden-Württemberg,  
Deutsches Krebsforschungszentrum (DKFZ)  
Im Neuenheimer Feld 581  
69120 Heidelberg  
[l.jansen@dkfz.de](mailto:l.jansen@dkfz.de)

Inhalt:

**Onlinetabelle 1** Übersicht über die eingeschlossenen Krebsregister im Diagnosezeitraum 1999-2017

**Onlineabbildung 1** Trends in der Altersverteilung zwischen 1999-2002 und 2013-2017 für Subgruppen von Mundhöhlen- und Pharynxkarzinomen bei Männern (a) und Frauen (b)

**Onlineabbildung 2** Trends in der Stadienverteilung für Subgruppen von Mundhöhlen- und Pharynxkarzinomen bei Männern (a) und Frauen (b) zwischen 2010-2011 und 2016-2017

**Onlineabbildung 3** Trends in altersstandardisierter Inzidenz (a/b), Mortalität (c/d) und altersstandardisiertem relativem Fünf-Jahres-Überleben (95 % Konfidenzintervall) (e/f) für Subgruppen von Mund- und Pharynxkarzinomen bei Männern (links) und Frauen (rechts).

**Onlinetabelle 1** Übersicht über die eingeschlossenen Krebsregister im Diagnosezeitraum 1999-2017

| Register                   | Einschluss<br>Inzidenz und<br>Mortalität | Einschluss<br>Überlebenszeitanalysen |                                 |                                           |                                   |
|----------------------------|------------------------------------------|--------------------------------------|---------------------------------|-------------------------------------------|-----------------------------------|
|                            | Bevölkerung<br>(Mio. in<br>2016)         | Diagnosejahre                        | Vitalstatus<br>Follow-up<br>bis | Krebs<br>Gesamt<br>DCO-Fälle <sup>a</sup> | C00-<br>C14<br>Fälle <sup>b</sup> |
| Schleswig-Holstein         | 2,88                                     | 1999-2017                            | 31.12.2017                      | 10%                                       | 8471                              |
| Hamburg                    | 1,81                                     | 1999-2017                            | 31.12.2017                      | 4%                                        | 5608                              |
| Niedersachsen              | 7,95                                     | 2003-2017                            | 31.12.2017                      | 8%                                        | 17044                             |
| Bremen                     | 0,68                                     | 1999-2017                            | 31.12.2017                      | 7%                                        | 2198                              |
| Nordrhein-Westfalen        | 17,87                                    | 1999-2017 <sup>c</sup>               | 31.12.2017                      | 10%                                       | 27529                             |
| Hessen                     | 6,21                                     | / <sup>d</sup>                       | /                               | /                                         | /                                 |
| Rheinland-Pfalz            | 4,07                                     | 1999-2017                            | 31.12.2017                      | 2%                                        | 9779                              |
| Baden-Württemberg          | 10,95                                    | 2010-2017                            | 31.12.2017                      | 8%                                        | 11529                             |
| Freistaat Bayern           | 12,93                                    | 2002-2017                            | 31.12.2017                      | 7%                                        | 28347                             |
| Saarland                   | 1,00                                     | 1999-2017                            | 31.12.2017                      | 8%                                        | 4020                              |
| Berlin                     | 3,57                                     | / <sup>d</sup>                       | /                               | /                                         | /                                 |
| Brandenburg                | 2,49                                     | 1999-2015                            | 31.12.2015                      | 11%                                       | 7317                              |
| Mecklenburg-<br>Vorpommern | 1,61                                     | 1999-2015                            | 31.12.2015                      | 10%                                       | 5982                              |
| Freistaat Sachsen          | 4,08                                     | 1999-2015                            | 31.12.2015                      | 7%                                        | 11884                             |
| Sachsen-Anhalt             | 2,24                                     | / <sup>d</sup>                       | /                               | /                                         | /                                 |
| Freistaat Thüringen        | 2,16                                     | 1999-2015                            | 31.12.2015                      | 9%                                        | 5670                              |
| <b>Gesamt</b>              | <b>82,52</b>                             | <b>1999-2015/17</b>                  |                                 | <b>9%</b>                                 | <b>145378</b>                     |

<sup>a</sup> Anteil der Fälle der allein auf der Todesbescheinigung basiert (death certificate only, DCO) an allen Krebsfällen (C00-C97 ohne sonstige bösartige Neubildungen der Haut (C44) 2015-2017 (in den östlichen Bundesländern 2015). <sup>b</sup> Nach Ausschluss von DCO Fällen. <sup>c</sup> Beschränkung auf den Regierungsbezirk Münster für die Diagnosejahre 1999-2009. <sup>d</sup> Ausschluss nach der Prüfung der Datenqualität

**Onlineabbildung 1** Trends in der Altersverteilung zwischen 1999-2002 und 2013-2017 für Subgruppen von Mundhöhlen- und Pharynxkarzinomen bei Männern (a) und Frauen (b)

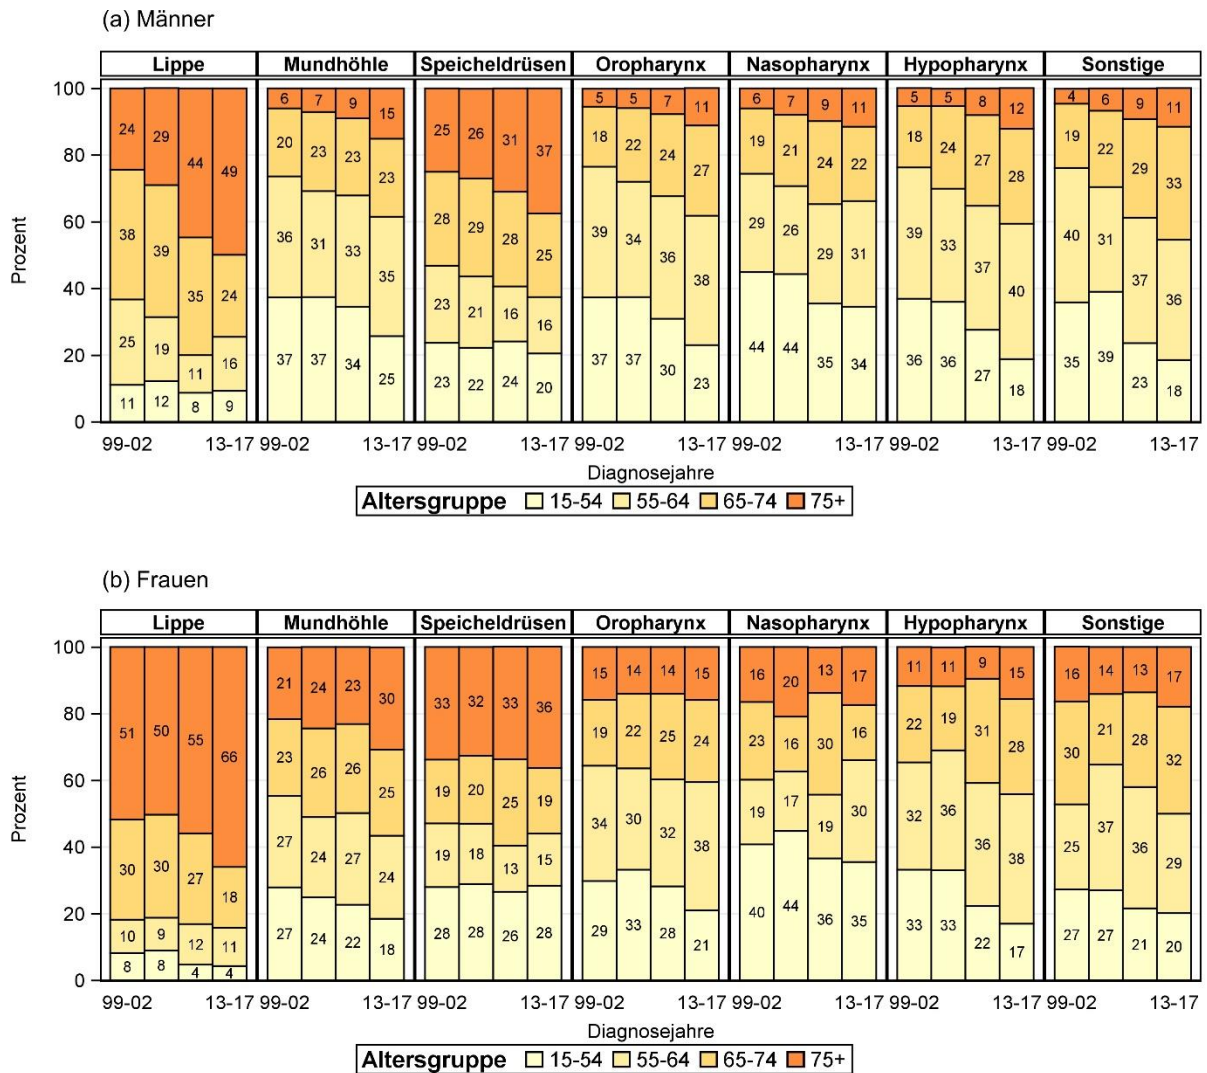

**Onlineabbildung 2** Trends in der Stadienverteilung für Subgruppen von Mundhöhlen- und Pharynxkarzinomen bei Männern (a) und Frauen (b) zwischen 2010-2011 und 2016-2017

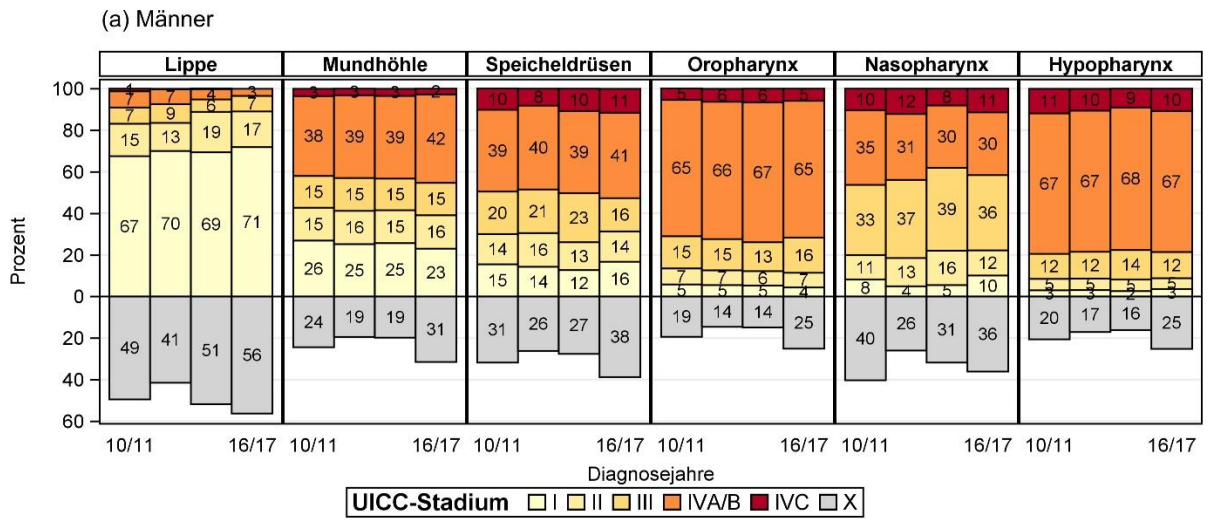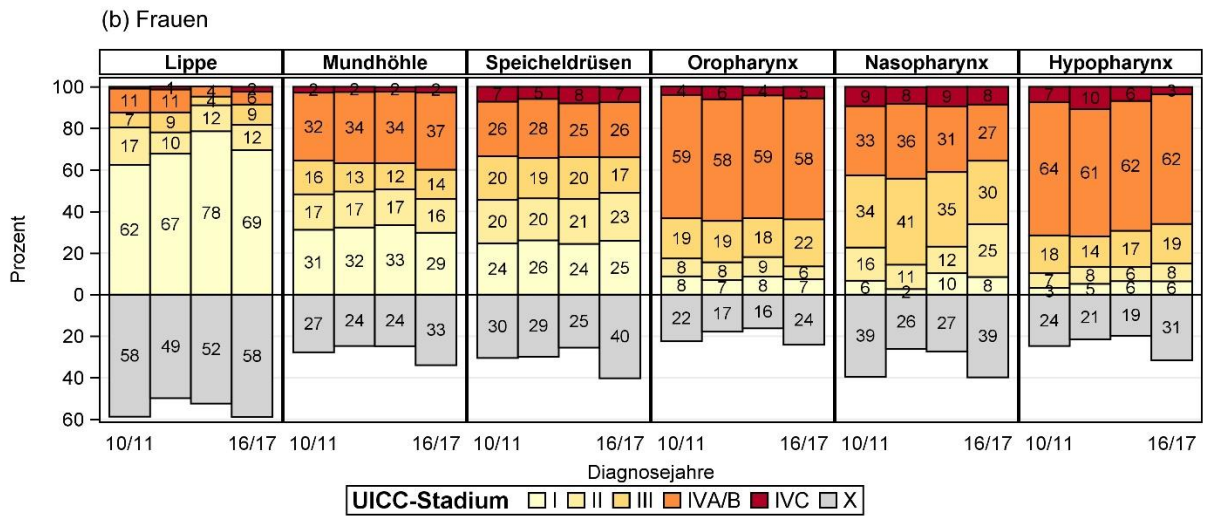

**Onlineabbildung 3** Trends in altersstandardisierter Inzidenz (a/b), Mortalität (c/d) und altersstandardisiertem relativem Fünf-Jahres-Überleben (95 % Konfidenzintervall) (e/f) für Subgruppen von Mund- und Pharynxkarzinomen bei Männern (links) und Frauen (rechts). Relative Überlebensraten mit Standardfehlern größer 5 % werden nicht dargestellt.

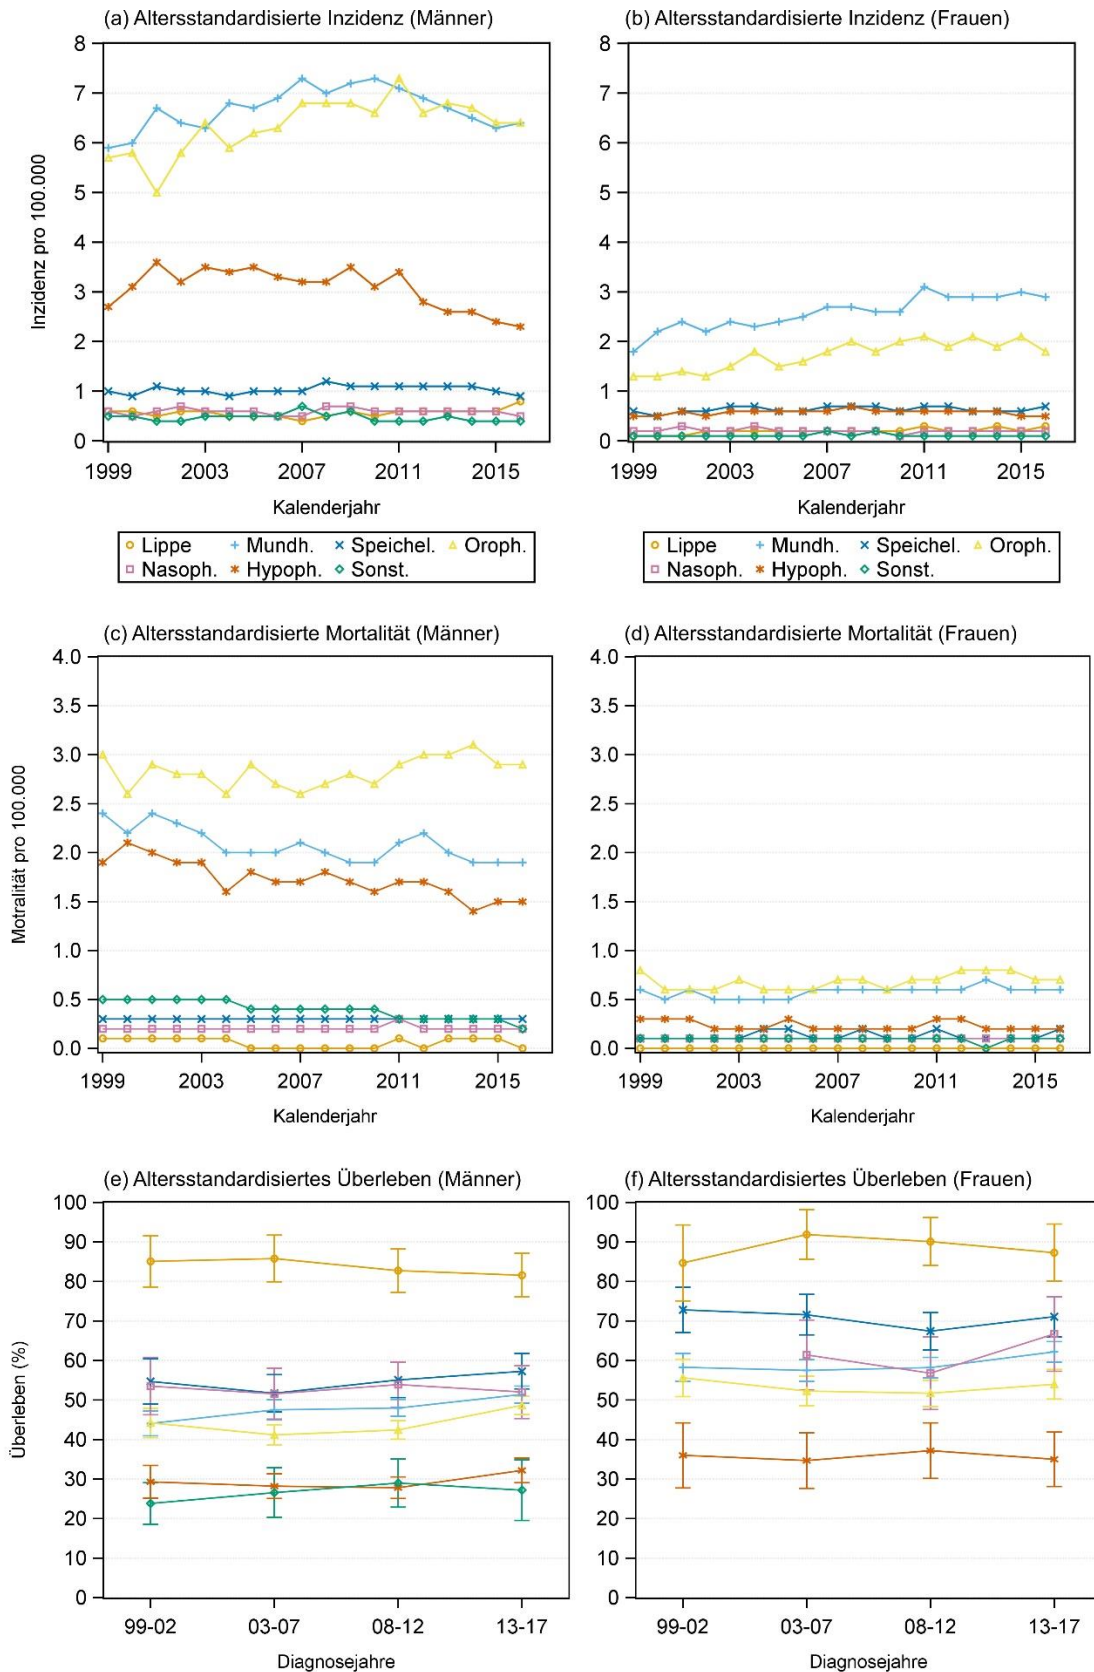

Supplement: MOESM1 [file 19319570]
